# Supplementary material
Source: bioRxiv or medRxiv preprint supplement (https://www.biorxiv.org/highwire/filestream/96148/field_highwire_adjunct_files/0/311654-1.pdf)
Supplement: Supplementary file [file 311654-1.pdf]

Table 1: Cases of DIDA combinations missed by OligoPVP prioritization incorporating protein-protein interaction network data, in comparison to ranks of individual variants of each digenic combination ranked by DeepPVP.

| DIDA ID | Gene A                      | Gene B                | Disease name (ORPHANET)                                  | DeepPVP Rank A | DeepPVP Rank B | OligoPVP Rank |
|---------|-----------------------------|-----------------------|----------------------------------------------------------|----------------|----------------|---------------|
| dd010   | NEK1 (c.1640insA)           | DYNC2H1 (c.11747G>A)  | Short rib-polydactyly syndrome                           | 1              | 2              | NA            |
| dd211   | MYH7 (c.2645A>G)            | RBM20 (c.2062C>T)     | Familial isolated dilated cardiomyopathy                 | 2              | 1              | NA            |
| dd040   | GDAF1 (c.358C>T)            | MFN2 (c.479.480delTG) | Charcot-Marie-Tooth disease                              | 1              | 2              | NA            |
| dd125   | EDA (c.769G>C)              | WNT10A (c.511C>T)     | Hypodontia                                               | 1              | 2              | NA            |
| dd218   | BMPR2 (c.1471C>T)           | KCNA5 (c.1448del)     | Heritable pulmonary arterial hypertension                | 1              | 2              | NA            |
| dd244   | NLRP3 (c.526C>T]            | MEFV (c.442G>C)       | Familial Mediterranean fever                             | 2              | 1              | NA            |
| dd028   | MITF (c.824delA)            | TYR (c.1205G>A)       | Ocular albinism with congenital sensorineural deafness   | 1              | 2              | NA            |
| dd013   | NSMF (c.1132-22_1132-15del) | FGFR1 (c.1025T>C)     | Kallmann syndrome                                        | 2              | 1              | NA            |
| dd018   | FGFR1 (c.165_171del)        | PROKR2 (c.518T>G)     | Kallmann syndrome                                        | 1              | 2              | NA            |
| dd164   | FGFR1 (c.1042G>A)           | IL17RD (c.1136A>G)    | Kallmann syndrome                                        | 1              | 2              | NA            |
| dd165   | KISS1R (c.581C>A)           | IL17RD (c.2204C>T)    | Kallmann syndrome                                        | 1              | 2              | NA            |
| dd166   | FGFR1 (c.2075A>G)           | DUSP6 (c.545C>T)      | Kallmann syndrome                                        | 1              | 2              | NA            |
| dd168   | SPRY4 (c.722C>A)            | DUSP6 (c.1037C>T)     | Kallmann syndrome                                        | 1              | 2              | NA            |
| dd169   | SPRY4 (c.722C>A)            | FGFR1 (c.1447C>A)     | Kallmann syndrome                                        | 2              | 1              | NA            |
| dd117   | TYR (c.230G>A)              | SLC45A2 (c.1045G>A)   | Oculocutaneous albinism                                  | 1              | 2              | NA            |
| dd121   | TYR (c.346C>T)              | OCA2 (c.1441G>A)      | Oculocutaneous albinism                                  | 1              | 2              | NA            |
| dd123   | LMBRD1 (c.1056delG)         | MTR (c.3518C>T)       | Homocystinuria without methylmalonic aciduria            | 2              | 1              | NA            |
| dd116   | WT1 (c.1228+5G>A)           | NPHS1 (c.1126C>G)     | Familial idiopathic steroid-resistant nephrotic syndrome | 1              | 2              | NA            |
| dd050   | HMBS (c.422+1G>T)           | UROD (c.650.651dupTT) | Porphyria                                                | 2              | 1              | NA            |
| dd001   | KCNQ1 (c.1022C>A)           | KCNH2 (c.2592+1G>A)   | Familial long QT syndrome                                | 1              | 2              | NA            |
| dd048   | KCNE2 (c.178T>C)            | SCN5A (c.4868G>A)     | Familial long QT syndrome                                | 2              | 1              | NA            |
| dd065   | KCNE1 (c.95G>A)             | SCN5A (c.4931G>A)     | Familial long QT syndrome                                | 2              | 1              | NA            |
| dd069   | SCN5A (c.5455G>A)           | KCNH2 (c.298C>G)      | Familial long QT syndrome                                | 1              | 2              | NA            |
| dd134   | ATP2B2 (c.1756G>A)          | MYO6 (c.737A>G)       | Non-syndromic genetic deafness                           | 1              | 2              | NA            |
| dd145   | KCNJ10 (c.1042C>T)          | SLC26A4 (c.919-2A>G)  | Non-syndromic genetic deafness                           | 2              | 1              | NA            |
| dd206   | GJB2 (c.35delG)             | TMPRSS3 (c.208delC)   | Non-syndromic genetic deafness                           | 2              | 1              | NA            |
| dd124   | MYO7A (c.2311G>T)           | PCDH15 (c.158-1G>A)   | Usher syndrome                                           | 2              | 1              | NA            |
| dd262   | TEK (c.309A>C)              | CYP1B1 (c.343G>C)     | Congenital glaucoma                                      | 2              | 1              | NA            |
| dd026   | MYOC (c.1196G>T)            | CYP1B1 (c.1103G>A)    | Juvenile glaucoma                                        | 2              | 1              | NA            |
| dd171   | ITGA7 (c.2656G>A)           | MYH7B (c.2668C>T)     | Left ventricular non-compaction                          | 2              | 1              | NA            |
| dd224   | TRIM54 (c.316G>A)           | TRIM63 (c.739C>T)     | Congenital myopathy with protein accumulation            | 1              | 2              | NA            |
| dd019   | BAAT (c.226A>G)             | TJP2 (c.143T>C)       | Familial hypercholanemia                                 | 1              | 2              | NA            |
| dd006   | ATP2B2 (c.1756G>A)          | CDH23 (c.5663T>C)     | Non-syndromic genetic deafness                           | 1              | 2              | NA            |
